# Supplementary material
Source: publisher figshare collection journal article supplement (https://acs.figshare.com/ndownloader/files/4146181)
Supplement: Supplementary file 1 [file 4146181]

 
data_vas4 
  
_audit_creation_method            SHELXL-97 
_chemical_name_systematic 
; 
 ? 
; 
_chemical_name_common             ? 
_chemical_melting_point           ? 
_chemical_formula_moiety          'C14 H9 Cl5 O3' 
_chemical_formula_sum 
 'C14 H9 Cl5 O3' 
_chemical_formula_weight          402.46 
  
loop_ 
 _atom_type_symbol 
 _atom_type_description 
 _atom_type_scat_dispersion_real 
 _atom_type_scat_dispersion_imag 
 _atom_type_scat_source 
 'C'  'C'   0.0033   0.0016 
 'International Tables Vol C Tables 4.2.6.8 and 6.1.1.4' 
 'H'  'H'   0.0000   0.0000 
 'International Tables Vol C Tables 4.2.6.8 and 6.1.1.4' 
 'O'  'O'   0.0106   0.0060 
 'International Tables Vol C Tables 4.2.6.8 and 6.1.1.4' 
 'Cl'  'Cl'   0.1484   0.1585 
 'International Tables Vol C Tables 4.2.6.8 and 6.1.1.4' 
  
_symmetry_cell_setting            Orthorhombic 
_symmetry_space_group_name_H-M    Iba2 
  
loop_ 
 _symmetry_equiv_pos_as_xyz 
 'x, y, z' 
 '-x, -y, z' 
 'x+1/2, -y+1/2, z' 
 '-x+1/2, y+1/2, z' 
 'x+1/2, y+1/2, z+1/2' 
 '-x+1/2, -y+1/2, z+1/2' 
 'x+1, -y+1, z+1/2' 
 '-x+1, y+1, z+1/2' 
  
_cell_length_a                    11.804(16) 
_cell_length_b                    37.23(3) 
_cell_length_c                    7.129(6) 
_cell_angle_alpha                 90.00 
_cell_angle_beta                  90.00 
_cell_angle_gamma                 90.00 
_cell_volume                      3132(6) 
_cell_formula_units_Z             8 
_cell_measurement_temperature     294(2) 
_cell_measurement_reflns_used     ? 
_cell_measurement_theta_min       ? 
_cell_measurement_theta_max       ? 
  
_exptl_crystal_description        plate 
_exptl_crystal_colour             yellow 
_exptl_crystal_size_max           0.20 
_exptl_crystal_size_mid           0.10 
_exptl_crystal_size_min           0.05 
_exptl_crystal_density_meas       ? 
_exptl_crystal_density_diffrn     1.707 
_exptl_crystal_density_method     'not measured' 
_exptl_crystal_F_000              1616 
_exptl_absorpt_coefficient_mu     0.933 
_exptl_absorpt_correction_type    none 
_exptl_absorpt_correction_T_min   ? 
_exptl_absorpt_correction_T_max   ? 
_exptl_absorpt_process_details    ? 
  
_exptl_special_details 
; 
 ? 
; 
  
_diffrn_ambient_temperature       294(2) 
_diffrn_radiation_wavelength      0.71073 
_diffrn_radiation_type            MoK\a 
_diffrn_radiation_source          'fine-focus sealed tube' 
_diffrn_radiation_monochromator   graphite 
_diffrn_measurement_device_type   'Bruker SMART APEX CCD' 
_diffrn_measurement_method        '\f and \w scans' 
_diffrn_detector_area_resol_mean  ? 
_diffrn_reflns_number             13006 
_diffrn_reflns_av_R_equivalents   0.1516 
_diffrn_reflns_av_sigmaI/netI     0.1232 
_diffrn_reflns_limit_h_min        -16 
_diffrn_reflns_limit_h_max        11 
_diffrn_reflns_limit_k_min        -51 
_diffrn_reflns_limit_k_max        50 
_diffrn_reflns_limit_l_min        -9 
_diffrn_reflns_limit_l_max        8 
_diffrn_reflns_theta_min          1.09 
_diffrn_reflns_theta_max          30.16 
_reflns_number_total              4322 
_reflns_number_gt                 2987 
_reflns_threshold_expression      >2sigma(I) 
  
_computing_data_collection        'Bruker SMART' 
_computing_cell_refinement        'Bruker SAINT' 
_computing_data_reduction         'Bruker SAINT' 
_computing_structure_solution     'SHELXS-97 (Sheldrick, 2008)' 
_computing_structure_refinement   'SHELXL-97 (Sheldrick, 2008)' 
_computing_molecular_graphics     'Bruker SHELXTL' 
_computing_publication_material   'Bruker SHELXTL' 
  
_refine_special_details 
; 
 Refinement of F^2^ against ALL reflections.  The weighted R-factor wR and 
 goodness of fit S are based on F^2^, conventional R-factors R are based 
 on F, with F set to zero for negative F^2^. The threshold expression of 
 F^2^ > 2sigma(F^2^) is used only for calculating R-factors(gt) etc. and is 
 not relevant to the choice of reflections for refinement.  R-factors based 
 on F^2^ are statistically about twice as large as those based on F, and R- 
 factors based on ALL data will be even larger. 
; 
  
_refine_ls_structure_factor_coef  Fsqd 
_refine_ls_matrix_type            full 
_refine_ls_weighting_scheme       calc 
_refine_ls_weighting_details 
 'calc w=1/[\s^2^(Fo^2^)+(0.0826P)^2^+0.0000P] where P=(Fo^2^+2Fc^2^)/3' 
_atom_sites_solution_primary      direct 
_atom_sites_solution_secondary    difmap 
_atom_sites_solution_hydrogens    geom 
_refine_ls_hydrogen_treatment     constr
_refine_ls_extinction_method      none 
_refine_ls_extinction_coef        ? 
_refine_ls_abs_structure_details 
 'Flack H D (1983), Acta Cryst. A39, 876-881' 
_refine_ls_abs_structure_Flack    0.10(11) 
_refine_ls_number_reflns          4322 
_refine_ls_number_parameters      201 
_refine_ls_number_restraints      1 
_refine_ls_R_factor_all           0.0886 
_refine_ls_R_factor_gt            0.0652 
_refine_ls_wR_factor_ref          0.1651 
_refine_ls_wR_factor_gt           0.1444 
_refine_ls_goodness_of_fit_ref    0.922 
_refine_ls_restrained_S_all       0.922 
_refine_ls_shift/su_max           0.001 
_refine_ls_shift/su_mean          0.000 
  
loop_ 
 _atom_site_label 
 _atom_site_type_symbol 
 _atom_site_fract_x 
 _atom_site_fract_y 
 _atom_site_fract_z 
 _atom_site_U_iso_or_equiv 
 _atom_site_adp_type 
 _atom_site_occupancy 
 _atom_site_symmetry_multiplicity 
 _atom_site_calc_flag 
 _atom_site_refinement_flags 
 _atom_site_disorder_assembly 
 _atom_site_disorder_group 
Cl1 Cl 0.0175(2) 0.26210(4) 0.6017(3) 0.0819(6) Uani 1 1 d . . . 
Cl3 Cl 0.42910(11) 0.15999(3) 0.81492(19) 0.0424(3) Uani 1 1 d . . . 
Cl4 Cl 0.23704(13) 0.14022(4) 1.09863(19) 0.0495(4) Uani 1 1 d . . . 
Cl5 Cl 0.09700(12) 0.06675(4) 1.0229(2) 0.0552(4) Uani 1 1 d . . . 
Cl6 Cl 0.15922(10) 0.02197(3) 0.6625(2) 0.0464(3) Uani 1 1 d . . . 
O2 O 0.5291(3) 0.08982(9) 0.7361(7) 0.0488(10) Uani 1 1 d . . . 
O11 O 0.3813(3) 0.03234(9) 0.8883(6) 0.0430(9) Uani 1 1 d . . . 
H11 H 0.4480 0.0337 0.9200 0.064 Uiso 1 1 calc R . . 
O12 O 0.4053(3) 0.03544(8) 0.5646(6) 0.0429(9) Uani 1 1 d . . . 
H12 H 0.3679 0.0173 0.5439 0.064 Uiso 1 1 calc R . . 
C1 C 0.3644(3) 0.05235(11) 0.7241(7) 0.0296(9) Uani 1 1 d . . . 
C2 C 0.4291(4) 0.08847(11) 0.7434(7) 0.0294(9) Uani 1 1 d . . . 
C3 C 0.3493(4) 0.12092(11) 0.7651(6) 0.0291(9) Uani 1 1 d . . . 
C4 C 0.2609(4) 0.11206(12) 0.9127(7) 0.0313(10) Uani 1 1 d . . . 
C5 C 0.2030(4) 0.08194(12) 0.8819(7) 0.0308(9) Uani 1 1 d . . . 
C6 C 0.2373(4) 0.06237(11) 0.7050(7) 0.0300(9) Uani 1 1 d . . . 
C7 C 0.2230(4) 0.08816(11) 0.5356(7) 0.0300(9) Uani 1 1 d . . . 
H7A H 0.2525 0.0768 0.4233 0.036 Uiso 1 1 calc R . . 
H7B H 0.1431 0.0930 0.5159 0.036 Uiso 1 1 calc R . . 
C8 C 0.2865(4) 0.12406(11) 0.5697(6) 0.0266(9) Uani 1 1 d . . . 
H8A H 0.3443 0.1266 0.4719 0.032 Uiso 1 1 calc R . . 
C9 C 0.2133(4) 0.15755(11) 0.5665(6) 0.0295(9) Uani 1 1 d . . . 
C10 C 0.1048(4) 0.15906(13) 0.6447(7) 0.0366(11) Uani 1 1 d . . . 
H10A H 0.0723 0.1381 0.6916 0.044 Uiso 1 1 calc R . . 
C11 C 0.0445(5) 0.19094(14) 0.6542(8) 0.0457(13) Uani 1 1 d . . . 
H11A H -0.0272 0.1913 0.7080 0.055 Uiso 1 1 calc R . . 
C12 C 0.0905(5) 0.22170(13) 0.5847(8) 0.0457(13) Uani 1 1 d . . . 
C13 C 0.1981(5) 0.22176(13) 0.4999(8) 0.0473(13) Uani 1 1 d . . . 
H13A H 0.2296 0.2427 0.4518 0.057 Uiso 1 1 calc R . . 
C14 C 0.2549(4) 0.18949(13) 0.4910(7) 0.0389(11) Uani 1 1 d . . . 
H14A H 0.3250 0.1890 0.4314 0.047 Uiso 1 1 calc R . . 
  
loop_ 
 _atom_site_aniso_label 
 _atom_site_aniso_U_11 
 _atom_site_aniso_U_22 
 _atom_site_aniso_U_33 
 _atom_site_aniso_U_23 
 _atom_site_aniso_U_13 
 _atom_site_aniso_U_12 
Cl1 0.1266(17) 0.0509(8) 0.0681(10) 0.0017(8) 0.0038(12) 0.0528(10) 
Cl3 0.0458(7) 0.0241(5) 0.0573(7) -0.0035(5) -0.0143(6) -0.0086(5) 
Cl4 0.0668(9) 0.0477(7) 0.0339(6) -0.0088(5) -0.0010(7) 0.0144(6) 
Cl5 0.0405(7) 0.0519(7) 0.0731(10) 0.0142(7) 0.0241(7) 0.0039(6) 
Cl6 0.0327(6) 0.0268(5) 0.0797(9) -0.0031(6) -0.0068(7) -0.0090(4) 
O2 0.0240(16) 0.0345(17) 0.088(3) -0.0002(18) 0.001(2) -0.0016(13) 
O11 0.0280(18) 0.0321(17) 0.069(2) 0.0158(16) -0.0105(19) -0.0013(14) 
O12 0.0375(19) 0.0251(16) 0.066(3) -0.0152(16) 0.0119(17) -0.0006(13) 
C1 0.0194(19) 0.0242(19) 0.045(3) 0.0012(19) -0.0020(19) 0.0010(15) 
C2 0.027(2) 0.0238(19) 0.038(2) 0.0034(17) -0.005(2) 0.0000(16) 
C3 0.028(2) 0.025(2) 0.034(2) 0.0005(17) 0.0003(19) -0.0030(16) 
C4 0.036(2) 0.026(2) 0.032(2) 0.0006(17) 0.001(2) 0.0085(17) 
C5 0.022(2) 0.032(2) 0.039(2) 0.0087(19) 0.0041(19) 0.0074(17) 
C6 0.0239(19) 0.0210(19) 0.045(3) -0.0010(18) 0.000(2) -0.0036(15) 
C7 0.032(2) 0.0238(19) 0.034(2) -0.0049(18) -0.004(2) 0.0004(16) 
C8 0.028(2) 0.0254(18) 0.027(2) 0.0027(16) -0.0009(18) -0.0001(16) 
C9 0.031(2) 0.028(2) 0.029(2) 0.0000(17) -0.0005(19) 0.0034(16) 
C10 0.036(2) 0.036(2) 0.038(3) 0.006(2) -0.001(2) 0.0079(18) 
C11 0.043(3) 0.051(3) 0.043(3) 0.000(2) 0.006(3) 0.015(2) 
C12 0.064(4) 0.036(2) 0.038(3) -0.003(2) -0.006(3) 0.024(2) 
C13 0.063(4) 0.025(2) 0.053(3) 0.003(2) -0.009(3) 0.003(2) 
C14 0.041(3) 0.033(2) 0.042(3) 0.003(2) 0.000(2) 0.001(2) 
  
_geom_special_details 
; 
 All esds (except the esd in the dihedral angle between two l.s. planes) 
 are estimated using the full covariance matrix.  The cell esds are taken 
 into account individually in the estimation of esds in distances, angles 
 and torsion angles; correlations between esds in cell parameters are only 
 used when they are defined by crystal symmetry.  An approximate (isotropic) 
 treatment of cell esds is used for estimating esds involving l.s. planes. 
; 
  
loop_ 
 _geom_bond_atom_site_label_1 
 _geom_bond_atom_site_label_2 
 _geom_bond_distance 
 _geom_bond_site_symmetry_2 
 _geom_bond_publ_flag 
Cl1 C12 1.737(5) . ? 
Cl3 C3 1.769(5) . ? 
Cl4 C4 1.713(5) . ? 
Cl5 C5 1.702(5) . ? 
Cl6 C6 1.789(4) . ? 
O2 C2 1.182(6) . ? 
O11 C1 1.402(6) . ? 
O11 H11 0.8200 . ? 
O12 C1 1.387(6) . ? 
O12 H12 0.8200 . ? 
C1 C6 1.552(6) . ? 
C1 C2 1.553(6) . ? 
C2 C3 1.540(6) . ? 
C3 C4 1.518(7) . ? 
C3 C8 1.582(6) . ? 
C4 C5 1.331(7) . ? 
C5 C6 1.512(7) . ? 
C6 C7 1.552(6) . ? 
C7 C8 1.551(6) . ? 
C7 H7A 0.9700 . ? 
C7 H7B 0.9700 . ? 
C8 C9 1.517(6) . ? 
C8 H8A 0.9800 . ? 
C9 C14 1.394(7) . ? 
C9 C10 1.398(7) . ? 
C10 C11 1.386(7) . ? 
C10 H10A 0.9300 . ? 
C11 C12 1.360(8) . ? 
C11 H11A 0.9300 . ? 
C12 C13 1.407(9) . ? 
C13 C14 1.377(7) . ? 
C13 H13A 0.9300 . ? 
C14 H14A 0.9300 . ? 
  
loop_ 
 _geom_angle_atom_site_label_1 
 _geom_angle_atom_site_label_2 
 _geom_angle_atom_site_label_3 
 _geom_angle 
 _geom_angle_site_symmetry_1 
 _geom_angle_site_symmetry_3 
 _geom_angle_publ_flag 
C1 O11 H11 109.5 . . ? 
C1 O12 H12 109.5 . . ? 
O12 C1 O11 113.2(4) . . ? 
O12 C1 C6 112.0(4) . . ? 
O11 C1 C6 109.8(4) . . ? 
O12 C1 C2 107.1(4) . . ? 
O11 C1 C2 108.4(4) . . ? 
C6 C1 C2 106.0(3) . . ? 
O2 C2 C3 125.5(4) . . ? 
O2 C2 C1 121.6(4) . . ? 
C3 C2 C1 112.8(4) . . ? 
C4 C3 C2 108.6(4) . . ? 
C4 C3 C8 107.7(4) . . ? 
C2 C3 C8 104.8(3) . . ? 
C4 C3 Cl3 113.9(3) . . ? 
C2 C3 Cl3 109.9(3) . . ? 
C8 C3 Cl3 111.4(3) . . ? 
C5 C4 C3 114.9(4) . . ? 
C5 C4 Cl4 124.0(4) . . ? 
C3 C4 Cl4 121.1(3) . . ? 
C4 C5 C6 114.0(4) . . ? 
C4 C5 Cl5 124.0(4) . . ? 
C6 C5 Cl5 122.0(3) . . ? 
C5 C6 C1 107.5(4) . . ? 
C5 C6 C7 108.8(3) . . ? 
C1 C6 C7 108.8(4) . . ? 
C5 C6 Cl6 114.1(3) . . ? 
C1 C6 Cl6 108.1(3) . . ? 
C7 C6 Cl6 109.4(3) . . ? 
C8 C7 C6 111.0(4) . . ? 
C8 C7 H7A 109.4 . . ? 
C6 C7 H7A 109.4 . . ? 
C8 C7 H7B 109.4 . . ? 
C6 C7 H7B 109.4 . . ? 
H7A C7 H7B 108.0 . . ? 
C9 C8 C7 115.5(4) . . ? 
C9 C8 C3 109.9(3) . . ? 
C7 C8 C3 107.5(3) . . ? 
C9 C8 H8A 107.9 . . ? 
C7 C8 H8A 107.9 . . ? 
C3 C8 H8A 107.9 . . ? 
C14 C9 C10 116.2(4) . . ? 
C14 C9 C8 120.4(4) . . ? 
C10 C9 C8 123.3(4) . . ? 
C11 C10 C9 121.6(5) . . ? 
C11 C10 H10A 119.2 . . ? 
C9 C10 H10A 119.2 . . ? 
C12 C11 C10 119.9(5) . . ? 
C12 C11 H11A 120.1 . . ? 
C10 C11 H11A 120.1 . . ? 
C11 C12 C13 121.2(4) . . ? 
C11 C12 Cl1 120.4(4) . . ? 
C13 C12 Cl1 118.4(4) . . ? 
C14 C13 C12 117.3(5) . . ? 
C14 C13 H13A 121.4 . . ? 
C12 C13 H13A 121.4 . . ? 
C13 C14 C9 123.7(5) . . ? 
C13 C14 H14A 118.2 . . ? 
C9 C14 H14A 118.2 . . ? 
  
loop_ 
 _geom_torsion_atom_site_label_1 
 _geom_torsion_atom_site_label_2 
 _geom_torsion_atom_site_label_3 
 _geom_torsion_atom_site_label_4 
 _geom_torsion 
 _geom_torsion_site_symmetry_1 
 _geom_torsion_site_symmetry_2 
 _geom_torsion_site_symmetry_3 
 _geom_torsion_site_symmetry_4 
 _geom_torsion_publ_flag 
O12 C1 C2 O2 -50.4(6) . . . . ? 
O11 C1 C2 O2 72.1(6) . . . . ? 
C6 C1 C2 O2 -170.1(5) . . . . ? 
O12 C1 C2 C3 127.6(4) . . . . ? 
O11 C1 C2 C3 -109.9(4) . . . . ? 
C6 C1 C2 C3 7.9(5) . . . . ? 
O2 C2 C3 C4 -134.4(6) . . . . ? 
C1 C2 C3 C4 47.6(5) . . . . ? 
O2 C2 C3 C8 110.6(6) . . . . ? 
C1 C2 C3 C8 -67.3(5) . . . . ? 
O2 C2 C3 Cl3 -9.2(7) . . . . ? 
C1 C2 C3 Cl3 172.8(3) . . . . ? 
C2 C3 C4 C5 -54.6(5) . . . . ? 
C8 C3 C4 C5 58.5(5) . . . . ? 
Cl3 C3 C4 C5 -177.4(3) . . . . ? 
C2 C3 C4 Cl4 127.5(4) . . . . ? 
C8 C3 C4 Cl4 -119.5(4) . . . . ? 
Cl3 C3 C4 Cl4 4.7(5) . . . . ? 
C3 C4 C5 C6 0.2(6) . . . . ? 
Cl4 C4 C5 C6 178.0(3) . . . . ? 
C3 C4 C5 Cl5 -178.2(3) . . . . ? 
Cl4 C4 C5 Cl5 -0.3(6) . . . . ? 
C4 C5 C6 C1 60.4(5) . . . . ? 
Cl5 C5 C6 C1 -121.2(4) . . . . ? 
C4 C5 C6 C7 -57.3(5) . . . . ? 
Cl5 C5 C6 C7 121.1(4) . . . . ? 
C4 C5 C6 Cl6 -179.7(3) . . . . ? 
Cl5 C5 C6 Cl6 -1.4(5) . . . . ? 
O12 C1 C6 C5 -177.6(3) . . . . ? 
O11 C1 C6 C5 55.8(5) . . . . ? 
C2 C1 C6 C5 -61.1(4) . . . . ? 
O12 C1 C6 C7 -59.9(4) . . . . ? 
O11 C1 C6 C7 173.4(3) . . . . ? 
C2 C1 C6 C7 56.5(4) . . . . ? 
O12 C1 C6 Cl6 58.8(4) . . . . ? 
O11 C1 C6 Cl6 -67.9(4) . . . . ? 
C2 C1 C6 Cl6 175.2(3) . . . . ? 
C5 C6 C7 C8 53.0(5) . . . . ? 
C1 C6 C7 C8 -63.9(4) . . . . ? 
Cl6 C6 C7 C8 178.2(3) . . . . ? 
C6 C7 C8 C9 -120.5(4) . . . . ? 
C6 C7 C8 C3 2.6(5) . . . . ? 
C4 C3 C8 C9 70.0(4) . . . . ? 
C2 C3 C8 C9 -174.4(3) . . . . ? 
Cl3 C3 C8 C9 -55.6(4) . . . . ? 
C4 C3 C8 C7 -56.5(4) . . . . ? 
C2 C3 C8 C7 59.1(4) . . . . ? 
Cl3 C3 C8 C7 177.9(3) . . . . ? 
C7 C8 C9 C14 -143.6(5) . . . . ? 
C3 C8 C9 C14 94.6(5) . . . . ? 
C7 C8 C9 C10 39.6(6) . . . . ? 
C3 C8 C9 C10 -82.3(5) . . . . ? 
C14 C9 C10 C11 -2.9(7) . . . . ? 
C8 C9 C10 C11 174.1(5) . . . . ? 
C9 C10 C11 C12 0.6(8) . . . . ? 
C10 C11 C12 C13 1.0(9) . . . . ? 
C10 C11 C12 Cl1 -178.2(4) . . . . ? 
C11 C12 C13 C14 -0.3(8) . . . . ? 
Cl1 C12 C13 C14 178.9(4) . . . . ? 
C12 C13 C14 C9 -2.2(8) . . . . ? 
C10 C9 C14 C13 3.8(7) . . . . ? 
C8 C9 C14 C13 -173.3(5) . . . . ? 
  
_diffrn_measured_fraction_theta_max    0.971 
_diffrn_reflns_theta_full              30.16 
_diffrn_measured_fraction_theta_full   0.971 
_refine_diff_density_max    0.641 
_refine_diff_density_min   -0.469 
_refine_diff_density_rms    0.140 
